# Supplementary material for: Additional effects of acupuncture on early comprehensive rehabilitation in patients with mild to moderate acute ischemic stroke: a multicenter randomized controlled trial
Source: Springer Nature journal article supplement (doi:10.1186/s12906-016-1193-y), 2016-07-18
Supplement: MOESM2 [file 10544328]

# Ethical Approvals of the Ethical Committees

The 3<sup>rd</sup> Affiliated Hospital of Zhejiang Chinese Medical University is held responsible for the project. The trial is being conducted in 3 hospitals (or 3 centers). The protocol has been submitted to the Ethical Committee of the 3<sup>rd</sup> Affiliated Hospital of Zhejiang Chinese Medical University firstly and passed the ethical review. Then it has been submitted to the ethical committees of 3 hospitals, where the trial will proceed. All the four ethical committees have approved the protocol and the ethical approvals are listed as follows:

1. Ethical approval of the 3<sup>rd</sup> Affiliated Hospital of Zhejiang Chinese Medical University. ( in Chinese)
2. Ethical approval of the 3<sup>rd</sup> Affiliated Hospital of Zhejiang Chinese Medical University. ( in English)
3. Ethical approval of Sir Run Run Shaw Hospital, College of Medicine, Zhejiang University.
4. Ethical approval of the Second Hospital of Jiaxing.
5. Ethical approval of Hangzhou First People's Hospital.

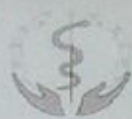

# 浙江中医药大学附属第三医院

浙江中医药大学附属第三医院医学伦理委员会

## 临床试验伦理审批件

|             |                                  |        |                       |
|-------------|----------------------------------|--------|-----------------------|
| 试验项目名称      | 缺血性脑卒中急性期中西医结合康复的临床研究            |        |                       |
| 研究期限        | 2012.01.01—2015.12.31            | 试验类别   | 多中心随机对照研究             |
| 项目负责单位      | 浙江中医药大学附属第三医院                    |        |                       |
| 合作单位        | 浙江大学医学院附属邵逸夫医院、嘉兴市第二医院、杭州市第一人民医院 |        |                       |
| 监督管理部门      | 浙江省中医药管理局                        | 项目编号   | 2011ZGG003            |
| 医疗机构        | 浙江中医药大学附属第三医院                    | 主要负责人  | 姚新苗                   |
| 申请部门        | 浙江中医药大学附属第三医院针灸科                 | 临床研究部门 | 针灸科、神经内科、康复科          |
| 项目负责人       | 方剑乔                              | 职称     | 教授、主任中医师              |
| 批件文号        | ZSLL-KY-2012-001-1               | 批件有效期  | 2012.01.20-2015.12.31 |
| 审 查 文 件 名 称 |                                  | 版 本    | 日 期                   |
| √           | 伦理审查申请书                          | 1.0    | 2012.1.15             |
| √           | 临床研究方案                           | 4.0    | 2012.1.15             |
| √           | 知情同意书                            | 2.0    | 2012.1.15             |
| √           | 研究者手册                            | 3.0    | 2012.1.15             |
| √           | 病例报告表                            | 2.0    | 2012.1.15             |

审批意见:

该项目设计科学,研究方法符合人体临床试验伦理学要求,  
同意在本单位进行临床试验。

浙江中医药大学附属第三医院  
医学伦理委员会 (盖章)

2012年1月20日

医学伦理委员会

伦理委员会联系电话: 0571-88393504

联系地址: 浙江省杭州市莫干山路 219 号 (310005)

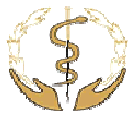

# 浙江中醫藥大學附屬第三醫院

Ethics Committee of the 3<sup>rd</sup> Affiliated Hospital of Zhejiang Chinese Medical University

## Ethical Approvals of Clinical Research

|                                                                                                                                                                                                                                                                                                              |                                                                                                                                          |                                         |                                            |
|--------------------------------------------------------------------------------------------------------------------------------------------------------------------------------------------------------------------------------------------------------------------------------------------------------------|------------------------------------------------------------------------------------------------------------------------------------------|-----------------------------------------|--------------------------------------------|
| Project name                                                                                                                                                                                                                                                                                                 | Clinical Research on Integrated Rehabilitation with Traditional Chinese and Western Medicine for Acute Stroke                            |                                         |                                            |
| Commencing and ending date                                                                                                                                                                                                                                                                                   | from July 2011 to June 2015                                                                                                              | Type of Research                        | Multicenter RCT                            |
| Charging hospital                                                                                                                                                                                                                                                                                            | The 3 <sup>rd</sup> Affiliated Hospital of Zhejiang Chinese Medical University                                                           |                                         |                                            |
| Cooperative hospitals                                                                                                                                                                                                                                                                                        | Sir Run Run Shaw Hospital, College of Medicine, Zhejiang University;<br>The 2nd Hospital of Jiaxing;<br>Hangzhou First People's Hospital |                                         |                                            |
| Supervision and Management department                                                                                                                                                                                                                                                                        | The Health Bureau of Zhejiang Province                                                                                                   | Project number                          | 2011ZGG003                                 |
| Medical institution                                                                                                                                                                                                                                                                                          | The 3 <sup>rd</sup> Affiliated Hospital of Zhejiang Chinese Medical University                                                           | The person in charge of the institution | XinMiao Yao                                |
| Application department                                                                                                                                                                                                                                                                                       | Department of Acupuncture                                                                                                                | Cooperative department                  | Department of Neurology and Rehabilitation |
| The person in charge of the project                                                                                                                                                                                                                                                                          | JianQiao Fang                                                                                                                            | Title                                   | Professor<br>Deputy President              |
| Approved document                                                                                                                                                                                                                                                                                            | ZSLL-KY-2012-001-1                                                                                                                       | Period of validity                      | 2012.1-2015.12                             |
| The Contents of Review                                                                                                                                                                                                                                                                                       |                                                                                                                                          | Version                                 | Date                                       |
| √                                                                                                                                                                                                                                                                                                            | The application of ethical review                                                                                                        | 1.0                                     | 2012.1.15                                  |
| √                                                                                                                                                                                                                                                                                                            | Study protocol                                                                                                                           | 4.0                                     | 2012.1.15                                  |
| √                                                                                                                                                                                                                                                                                                            | Informed consent                                                                                                                         | 2.0                                     | 2012.1.15                                  |
| √                                                                                                                                                                                                                                                                                                            | Handbook of researchers                                                                                                                  | 3.0                                     | 2012.1.15                                  |
| √                                                                                                                                                                                                                                                                                                            | Case report                                                                                                                              | 2.0                                     | 2012.1.15                                  |
| Opinions of Approval:<br>The protocol is designed sciencely, and is consistent with human ethical requirements.<br>The ethics committee agreed to conduct the clinical trials.<br><br>The 3 <sup>rd</sup> Affiliated Hospital of Zhejiang Chinese Medical University<br>Ethics Committee<br>January 20, 2012 |                                                                                                                                          |                                         |                                            |

TTEL: +86-571-88393504

Address: No.219, Moganshan Road, XiHu District Hangzhou, Zhejiang Province,310005, China.

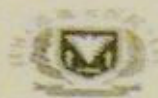

浙江大学医学院附属

邵逸夫醫院

浙江大学医学院附属邵逸夫医院医学伦理委员会

Ethics Committee of Sir Run Run Shaw Hospital, College of Medicine, Zhejiang University

## 伦理审查批件

批件文号：科研项目 20120201

|                                                                                                                                      |                         |          |                                        |                             |                              |
|--------------------------------------------------------------------------------------------------------------------------------------|-------------------------|----------|----------------------------------------|-----------------------------|------------------------------|
| 项目名称                                                                                                                                 | 缺血性脑卒中急性期中西医结合康复的临床研究   |          |                                        |                             |                              |
| 研究期限                                                                                                                                 | 2012-01-01 至 2015-12-31 |          | 试验类别                                   | 多中心随机对照研究                   |                              |
| 受试者总例数                                                                                                                               | 240                     | 申请医疗机构承担 | 80                                     | 其他机构承担                      | 160                          |
| 项目来源                                                                                                                                 | 浙江省中医药管理局中医药防治重大疾病攻关计划  |          |                                        |                             |                              |
| 监督管理部门                                                                                                                               | 浙江中医药大学附属第三医院           |          | 项目编号                                   | 2011ZGG003                  |                              |
| 承担单位                                                                                                                                 | 浙江中医药大学附属第三医院           |          | 项目负责人                                  | 方剑乔                         |                              |
| 协作单位                                                                                                                                 | 浙江大学医学院附属邵逸夫医院          |          | 分中心负责人                                 | 李建华                         |                              |
|                                                                                                                                      | 嘉兴市第二医院                 |          |                                        | 顾旭东                         |                              |
|                                                                                                                                      | 杭州市第一人民医院               |          |                                        | 陈丽娜                         |                              |
| 审 查 内 容                                                                                                                              |                         |          | 审 查 意 见                                |                             |                              |
| 立题伦理性                                                                                                                                |                         |          | 同意 <input checked="" type="checkbox"/> | 修正 <input type="checkbox"/> | 不同意 <input type="checkbox"/> |
| 知情同意书 (2.0 版,2012.1.15)                                                                                                              |                         |          | 同意 <input checked="" type="checkbox"/> | 修正 <input type="checkbox"/> | 不同意 <input type="checkbox"/> |
| 临床研究方案 (4.0 版,2012.1.15)                                                                                                             |                         |          | 同意 <input checked="" type="checkbox"/> | 修正 <input type="checkbox"/> | 不同意 <input type="checkbox"/> |
| 病例报告表 (2.0 版,2012.1.15)                                                                                                              |                         |          | 同意 <input checked="" type="checkbox"/> | 修正 <input type="checkbox"/> | 不同意 <input type="checkbox"/> |
| 研究人员配备                                                                                                                               |                         |          | 同意 <input checked="" type="checkbox"/> | 修正 <input type="checkbox"/> | 不同意 <input type="checkbox"/> |
| 综合审核意见：<br>该项目设计科学，研究方法符合人体临床试验伦理学要求，<br>同意在本单位进行临床试验。                                                                               |                         |          |                                        |                             |                              |
| 浙江大学医学院附属邵逸夫医院<br>医学伦理委员会 (盖章)<br>2012年2月1日<br>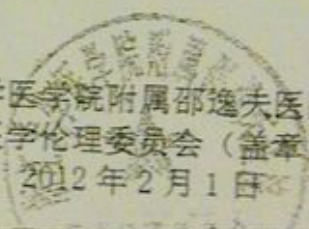 |                         |          |                                        |                             |                              |

联系电话：0571-86044817

联系地址：浙江省杭州市庆春东路3号

# 嘉兴市第二医院涉及人体研究的伦理委员会批准书

Ethics Committee Approval on Clinical Research of the 2nd Hospital of Jiaxing

项目名称：浙江省中医药防治重大疾病攻关计划项目-- 中风后遗症中西医结合整体康复的临床研究

项目负责人单位：浙江省针灸推拿医院                      项目负责人：方剑乔 教授

通讯地址：杭州市莫干山路 219 号                      联系方式：0571-87238288

项目分中心研究内容：缺血性脑卒中急性期中西医结合康复治疗临床研究

项目分中心单位：嘉兴市第二医院

项目分中心负责人姓名学历：顾旭东主任医师    科室： 康复医学中心

电话： 0573-82073236

电子邮箱： jxgxd@hotmail.com

通信地址：浙江省嘉兴市环城北路 1518 号康复医学中心

## 伦理委员会意见：

该项目实验目的明确，实验设计合理，对受试者的选择公正，且受试者承担的风险是最小的，有适当的监督措施，能够确保受试者的安全。并且本项目预期结果意义重大。受试者能够获得书面证明的知情同意。经伦理委员会审查，对该项目的申请予以批准。

伦理委员会主席

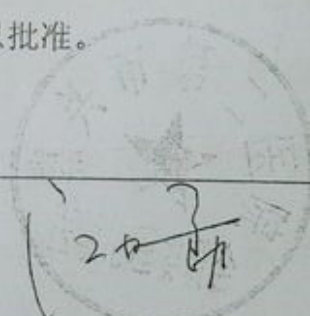

日期

2018. 3. 18

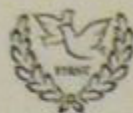

伦理审查批件

杭州市第一人民医院伦理委员会 2012 第 006 号

|                                                         |                                        |                             |                              |
|---------------------------------------------------------|----------------------------------------|-----------------------------|------------------------------|
| 项目名称                                                    | 缺血性脑卒中急性期中西医结合康复的临床研究                  |                             |                              |
| 研究期限                                                    | 2012-01-01 至 2015-12-31                | 试验类别                        | 多中心随机对照研究                    |
| 受试者总例数                                                  | 240                                    | 申请医疗机构承担                    | 80                           |
|                                                         |                                        | 其他机构承担                      | 160                          |
| 项目来源                                                    | 浙江省中医药管理局中医药防治重大疾病攻关计划                 |                             |                              |
| 监督管理部门                                                  | 浙江中医药大学附属第三医院                          | 项目编号                        | 2011ZGG003                   |
| 承担单位                                                    | 浙江中医药大学附属第三医院                          | 项目负责人                       | 方剑乔                          |
| 协作单位                                                    | 浙江大学医学院附属邵逸夫医院                         | 分中心负责人                      | 李建华                          |
|                                                         | 嘉兴市第二医院                                |                             | 顾旭东                          |
|                                                         | 杭州市第一人民医院                              |                             | 陈丽娜                          |
| 审 查 内 容                                                 |                                        | 委员投票结果                      |                              |
| 立题伦理性                                                   | 同意 <input checked="" type="checkbox"/> | 修正 <input type="checkbox"/> | 不同意 <input type="checkbox"/> |
| 知情同意书 (2.0 版, 2012.1.15)                                | 同意 <input checked="" type="checkbox"/> | 修正 <input type="checkbox"/> | 不同意 <input type="checkbox"/> |
| 临床研究方案 (4.0 版, 2012.1.15)                               | 同意 <input checked="" type="checkbox"/> | 修正 <input type="checkbox"/> | 不同意 <input type="checkbox"/> |
| 病例报告表 (2.0 版, 2012.1.15)                                | 同意 <input checked="" type="checkbox"/> | 修正 <input type="checkbox"/> | 不同意 <input type="checkbox"/> |
| 研究人员配备                                                  | 同意 <input checked="" type="checkbox"/> | 修正 <input type="checkbox"/> | 不同意 <input type="checkbox"/> |
| 综合审核意见:<br>该项目设计科学, 研究方法符合人体临床试验伦理学要求,<br>同意在本单位进行临床试验。 |                                        |                             |                              |

杭州市第一人民医院  
医学伦理委员会 (盖章)  
2012 年 2 月 6 日  
医学伦理委员会
